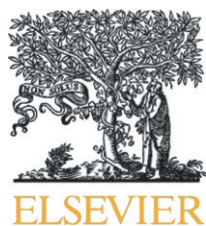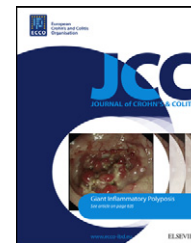

# Environmental factors in a population-based inception cohort of inflammatory bowel disease patients in Europe — An ECCO-EpiCom study<sup>☆</sup>

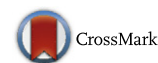

J. Burisch<sup>a,\*</sup>, N. Pedersen<sup>a</sup>, S. Cukovic-Cavka<sup>b</sup>, N. Turk<sup>b</sup>, I. Kaimakliotis<sup>c</sup>, D. Duricova<sup>d</sup>, M. Bortlik<sup>d</sup>, O. Shonová<sup>e</sup>, I. Vind<sup>f</sup>, S. Avnstrøm<sup>f</sup>, N. Thorsgaard<sup>g</sup>, S. Krabbe<sup>h</sup>, V. Andersen<sup>h,i,j</sup>, J.F. Dahlerup<sup>k</sup>, J. Kjeldsen<sup>l</sup>, R. Salupere<sup>m</sup>, J. Olsen<sup>n</sup>, K.R. Nielsen<sup>n</sup>, P. Manninen<sup>o</sup>, P. Collin<sup>o</sup>, K.H. Katsanos<sup>p</sup>, E.V. Tsianos<sup>p</sup>, K. Ladefoged<sup>q</sup>, L. Lakatos<sup>r</sup>, G. Ragnarsson<sup>s</sup>, E. Björnsson<sup>s</sup>, Y. Bailey<sup>t</sup>, C. O'Morain<sup>t</sup>, D. Schwartz<sup>u</sup>, S. Odes<sup>u</sup>, M. Giannotta<sup>v,1</sup>, G. Girardin<sup>w,1</sup>, G. Kiudelis<sup>x</sup>, L. Kupcinskas<sup>x</sup>, S. Turcan<sup>y</sup>, L. Barros<sup>z</sup>, F. Magro<sup>aa,ab,ac</sup>, D. Lazar<sup>ad</sup>, A. Goldis<sup>ad</sup>, I. Nikulina<sup>ae</sup>, E. Belousova<sup>ae</sup>, D. Martinez-Ares<sup>af</sup>, V. Hernandez<sup>af</sup>, S. Almer<sup>ag,ah</sup>, Y. Zhulina<sup>ai</sup>, J. Halfvarson<sup>ai,aj</sup>, N. Arebi<sup>ak</sup>, H.H. Tsai<sup>al</sup>, S. Sebastian<sup>al</sup>, P.L. Lakatos<sup>r</sup>, E. Langholz<sup>am</sup>, P. Munkholm<sup>a</sup>, for the EpiCom-group

<sup>a</sup> Digestive Disease Centre, Medical Section, Herlev University Hospital, Copenhagen, Denmark

<sup>b</sup> Division of Gastroenterology and Hepatology, University Hospital Center Zagreb, University of Zagreb School of Medicine, Zagreb, Croatia

<sup>c</sup> Nicosia Private Practice, Nicosia, Cyprus

<sup>d</sup> IBD Center ISCARE, Charles University, Prague, Czech Republic

<sup>e</sup> Gastroenterology Department, Hospital České Budějovice, České Budějovice, Czech Republic

<sup>f</sup> Department of Medicine, Amager Hospital, Amager, Denmark

<sup>g</sup> Department of Medicine, Herning Central Hospital, Herning, Denmark

<sup>h</sup> Medical Department, Viborg Regional Hospital, Viborg, Denmark

<sup>i</sup> Organ Centre, Hospital of Southern Jutland, Aabenraa, Denmark

<sup>j</sup> Institute of Regional Health Research, University of Southern Denmark, Odense, Denmark

<sup>k</sup> Department of Medicine V (Hepatology and Gastroenterology), Aarhus University Hospital, Aarhus, Denmark

**Abbreviations:** CD, Crohn's disease; ECCO, European Crohn's and Colitis Organisation; EpiCom, Epidemiological Committee; GCS, glucocorticosteroids; IBD, inflammatory bowel disease; IBDU, inflammatory bowel disease unclassified; IOIBD, International Organisation of Inflammatory Bowel Diseases; OR, odds ratio; 95% CI, 95% confidence interval; UC, ulcerative colitis.

<sup>☆</sup> Conference presentation: Data were presented at the ECCO Congress February 14–16th 2013 in Vienna.

\* Corresponding author at: Digestive Disease Centre, Medical Section, Herlev University Hospital, Herlev Ringvej 75, DK-2730, Denmark. Tel.: +45 38689881.

E-mail address: [burisch@dadlnet.dk](mailto:burisch@dadlnet.dk) (J. Burisch).

<sup>1</sup> On behalf of the EpiCom Northern Italy centre based in Crema & Cremona, Firenze, Forlì, Padova and Reggio Emilia, Italy.

- <sup>l</sup> Department of Medical Gastroenterology, Odense University Hospital, Odense, Denmark
- <sup>m</sup> Division of Endocrinology and Gastroenterology, Tartu University Hospital, Tartu, Estonia
- <sup>n</sup> Medical Department, The National Hospital of the Faroe Islands, Torshavn, Faroe Islands
- <sup>o</sup> Department of Gastroenterology and Alimentary Tract Surgery, Tampere University Hospital, Tampere, Finland
- <sup>p</sup> 1st Division of Internal Medicine and Hepato-Gastroenterology Unit, University Hospital, Ioannina, Greece
- <sup>q</sup> Medical Department, Dronning Ingrid's Hospital, Nuuk, Greenland
- <sup>r</sup> 1st Department of Medicine, Semmelweis University, Budapest, Hungary
- <sup>s</sup> Department of Internal Medicine, Section of Gastroenterology and Hepatology, The National University Hospital, Reykjavik, Iceland
- <sup>t</sup> Department of Gastroenterology, Adelaide and Meath Hospital, TCD, Dublin, Ireland
- <sup>u</sup> Department of Gastroenterology and Hepatology, Soroka Medical Center and Ben Gurion University of the Negev, Beer Sheva, Israel
- <sup>v</sup> Gastroenterology Unit, Careggi Hospital, Florence, Italy
- <sup>w</sup> U.O. Gastroenterologia, Azienda Ospedaliera — Università di Padova, Padova, Italy
- <sup>x</sup> Institute for Digestive Research, Lithuanian University of Health Sciences, Kaunas, Lithuania
- <sup>y</sup> Department of Gastroenterology, State University of Medicine and Pharmacy of the Republic of Moldova, Chisinau, Republic of Moldova
- <sup>z</sup> Hospital de Vale de Sousa, Porto, Portugal
- <sup>aa</sup> Department of Gastroenterology, Hospital de São João, Porto, Portugal
- <sup>ab</sup> Institute of Pharmacology and Therapeutics, Oporto Medical School, Porto, Portugal
- <sup>ac</sup> Institute for Molecular and Cell Biology, University of Porto, Porto, Portugal
- <sup>ad</sup> Clinic of Gastroenterology, University of Medicine 'Victor Babes', Timisoara, Romania
- <sup>ae</sup> Department of Gastroenterology, Moscow Regional Research Clinical Institute, Moscow, Russian Federation
- <sup>af</sup> Gastroenterology Department, Complejo Hospitalario Universitario de Vigo, Vigo, Spain
- <sup>ag</sup> Division of Gastroenterology and Hepatology, Karolinska Institutet, Stockholm, Sweden
- <sup>ah</sup> Department of Gastroenterology/UHL, County Council of Östergötland, Linköping, Sweden
- <sup>ai</sup> Department of Medicine, Division of Gastroenterology, Örebro University Hospital, Örebro, Sweden
- <sup>aj</sup> School of Health and Medical Sciences, Örebro University, Örebro, Sweden
- <sup>ak</sup> St. Mark's Hospital, Imperial College London, London, UK
- <sup>al</sup> Hull and East Yorkshire NHS Trust, Hull and York Medical School, Hull Royal Infirmary, Hull, UK
- <sup>am</sup> Department of Medical Gastroenterology, Gentofte Hospital, Copenhagen, Denmark

Received 24 August 2013; received in revised form 15 November 2013; accepted 18 November 2013

## KEYWORDS

Environmental factors;  
Population-based;  
Inception cohort;  
Inflammatory bowel disease

## Abstract

**Background and Aims:** The incidence of inflammatory bowel disease (IBD) is increasing in Eastern Europe possibly due to changes in environmental factors towards a more “westernised” standard of living. The aim of this study was to investigate differences in exposure to environmental factors prior to diagnosis in Eastern and Western European IBD patients.

**Methods:** The EpiCom cohort is a population-based, prospective inception cohort of 1560 unselected IBD patients from 31 European countries covering a background population of 10.1 million. At the time of diagnosis patients were asked to complete an 87-item questionnaire concerning environmental factors.

**Results:** A total of 1182 patients (76%) answered the questionnaire, 444 (38%) had Crohn's disease (CD), 627 (53%) ulcerative colitis (UC), and 111 (9%) IBD unclassified. No geographic differences regarding smoking status, caffeine intake, use of oral contraceptives, or number of first-degree relatives with IBD were found. Sugar intake was higher in CD and UC patients from Eastern Europe than in Western Europe while fibre intake was lower ( $p < 0.01$ ). Daily consumption of fast food as well as appendectomy before the age of 20 was more frequent in Eastern European than in Western European UC patients ( $p < 0.01$ ). Eastern European CD and UC patients had received more vaccinations and experienced fewer childhood infections than Western European patients ( $p < 0.01$ ).

**Conclusions:** In this European population-based inception cohort of unselected IBD patients, Eastern and Western European patients differed in environmental factors prior to diagnosis. Eastern European patients exhibited higher occurrences of suspected risk factors for IBD included in the Western lifestyle.

© 2013 European Crohn's and Colitis Organisation. Published by Elsevier B.V. All rights reserved.

## 1. Introduction

The occurrence of inflammatory bowel disease (IBD), Crohn's disease (CD) and ulcerative colitis (UC) is increasing in Europe<sup>1</sup> and across the rest of the world.<sup>2</sup> Recent studies from Eastern Europe<sup>3,4</sup> have reported incidence rates comparable with Western European countries; however, the overall regional incidence of both CD and UC is twice as high in Western Europe as compared to Eastern Europe.<sup>5</sup> Changes in lifestyle in Eastern Europe during the last two decades have resulted in a more "westernised" standard of living. With many aspects of westernisation associated with a risk of IBD,<sup>6</sup> such changes – including an altered diet<sup>7,8</sup> – could partly explain the observed increases in the incidence of UC and CD in this geographic region.

The European Crohn's and Colitis Organisation's (ECCO) Epidemiological Committee (EpiCom) study is a prospective population-based inception cohort of 1560 unselected IBD patients diagnosed within 31 centres from Eastern and Western Europe during 2010. In EpiCom-study it was shown that incidence rates for CD and UC in Western European centres are twice as high as in Eastern European centres.<sup>5</sup> The aim of this study was to investigate differences in exposure to environmental factors between Eastern and Western European patients and whether these differences could explain the observed incidence gradient. Furthermore, to investigate the possible influence of environmental factors on disease presentation at diagnosis and disease outcome within the first year.

## 2. Materials and methods

### 2.1. Study population

During a one-year inclusion period from January 1st to December 31st 2010, all incident IBD patients living in predefined, well-described geographical areas were recruited from 31 centres in 8 Eastern and 14 Western European countries in the EpiCom-cohort. A total number of 1560 adult and paediatric IBD patients were included out of a total background population of 10.1 million inhabitants (3.3 million in Eastern and 6.8 million in Western Europe). Diagnostic criteria, time period of inclusion, recorded patient data, and ascertainment methods were standardised and consistent.<sup>5</sup> All incident patients were included and followed-up carefully as previously described.<sup>5,9</sup> Patients aged <15 years at diagnosis were excluded from this paper.

### 2.2. Definitions and disease classifications

Patients were diagnosed with CD, UC or IBD unclassified (IBDU) according to the *Copenhagen Diagnostic Criteria*.<sup>10–12</sup> Infectious gastroenteritis, endamoeba and cancer had to be ruled out in order to make the diagnosis. Patients who during follow-up ended up with not having IBD were excluded from the cohort. Disease classification of CD and UC regarding extent, localization and behaviour was defined using the *Montreal Classification*.<sup>13</sup> Medical treatment was grouped into five treatment groups of ascending potency of treatment: 5-aminosalicylates (5-ASA) (oral and/or topical 5-ASA

treatment ± topical steroids), glucocorticosteroids (GCS) (oral steroids ± 5-ASA or topical steroids), immunomodulators (azathioprine, 6-mercaptopurine, cyclosporine or methotrexate ± steroids), biologicals (infliximab or adalimumab in combination with any of the above), and surgery (major abdominal surgery due to IBD regardless of medical treatment prior to surgery). Immunomodulators were combined in one category due to the fact that 94% of patients received treatment with thiopurines. A severe disease course in UC was defined as any disease extent and a need of high dose GCS (0.5–1 mg/kg), and/or immunomodulators, and/or biologicals, and/or surgery, while severe CD was defined as the necessity for immunomodulators, and/or biologicals, and/or surgery within the first year after diagnosis.

### 2.3. Environmental factors questionnaire

Environmental factors prior to the development of IBD were assessed using a questionnaire developed by the International Organisation of Inflammatory Bowel Diseases (IOIBD). The questionnaire consists of 87 questions covering 25 different topics proposed to be environmental risk factors for CD and/or UC and has previously been used in IBD cohorts<sup>14–16</sup> and evaluated in a case-control study.<sup>17</sup> For statistical analysis items were grouped into fourteen parameters: smoking status at diagnosis, appendectomy before age 20, tonsillectomy before age 20, use of oral contraceptives, breastfeeding during infancy, childhood infections (measles, pertussis, rubella, chickenpox, mumps, and/or scarlet fever), vaccinations (tuberculosis, pertussis, measles, rubella, diphtheria, tetanus, and/or polio), high sugar consumption ( $\geq 2$  of the following: sugar in coffee, sugar in tea, daily intake of soft drinks, sugar on breakfast cereals, sugar on porridge), high fibre intake (daily intake of  $\geq 3$  of the following categories: fruit, vegetables, whole meal bread,  $\geq 4$  pieces of bread, cornflakes, muesli), fast food consumption, high intake of caffeine ( $\geq 2$  cups of coffee or tea per day), daily physical activity, access to running water at home, and IBD in first-degree relatives.

### 2.4. Data collection

Data regarding patient demographics and disease classification at diagnosis, as well as medical therapy including biological therapy, surgery, and hospitalizations, were collected at time of diagnosis and prospectively throughout the follow-up period. Validity of diagnostic and clinical data was secured by a variety of measures as previously described<sup>5</sup> including built-in control and validation tests, locked diagnostic criteria in the database, manual data standardisation, and random audits of case ascertainment and data quality at participating centres showing good consistency with the protocol. Patients were asked to complete the IOIBD environmental factors questionnaire either by themselves or, depending on educational level and whether local translations of the questionnaire exist, during an interview by the physician or IBD specialist trained nurses during an outpatient visit. Data were entered by physicians and/or IBD specialist trained nurses in the web-based EpiCom database.<sup>18</sup>

## 2.5. Statistical analysis

Statistical analyses were performed using SAS software version 9.2 (SAS Institute Inc., Cary, NC, USA). Demographics and disease classification between groups were compared with Chi-square test. The influence of environmental factors for CD and UC patients from both regions combined on disease classification at diagnosis, hospitalization, surgery, biological therapy, severe disease course, extra-intestinal manifestations at diagnosis, and highest treatment step reached during follow-up was analysed using multivariate logistic regression, while the impact on age of diagnosis was analysed with simple multivariate linear regression. Gender, age, and geographic region were included in the analysis, together with disease classification, when relevant, as these were considered confounding variables. Childhood infections and vaccinations were excluded from the analysis as they were highly correlated with year of birth. A p-value of <0.05 was considered statistically significant. Continuous variables are expressed as median (range) unless otherwise stated.

## 2.6. Ethical considerations

The study was approved by the local ethical committees according to local regulations. All patients gave written informed consent prior to answering the questionnaires.

## 3. Results

### 3.1. Description of study population

In total, 1182 patients (76% of the original cohort) aged 15 years or older at diagnosis answered the questionnaire after a median time of 1.1 months from diagnosis (range: 0–16 months). Of these, 444 (38%) had CD, 627 (53%) UC, and 111 (9%) IBDU. A total of 249 (21%) patients came from Eastern European centres while 933 (79%) patients came from Western European centres. Patients' demographic characteristics are presented in Table 1; no differences were found between the geographic regions except for highest treatment step reached during follow-up for CD and UC patients. Of the 368 patients who did not answer the questionnaire, 45 (4%) were <15 years at diagnosis and not invited to participate in this study and 333 (96%) did not give consent. Non-responding patients differed only in the distribution of diagnosis (the fraction of CD patients was larger and the fraction of IBDU patients was smaller compared to responders), and in terms of extra-intestinal manifestations (fewer patients had extra-intestinal manifestations compared to responders).

### 3.2. Environmental factors in European IBD patients

Occurrences of environmental factors in Western and Eastern European IBD patients are shown in Table 2. Geographic differences were found in terms of childhood vaccinations (tuberculosis, pertussis, measles, rubella, diphtheria, and polio) as significantly more CD and UC patients in Eastern Europe had received vaccinations against these agents compared with Western European patients ( $p < 0.01$ ). Furthermore, for both

CD and UC more Western European patients had experienced infections (measles, pertussis, and mumps) during childhood ( $p < 0.01$ ). Regarding dietary risk factors, more Western European CD and UC patients reported high daily fibre intake as well as low daily sugar intake ( $p < 0.01$ ). More Eastern than Western European UC patients had a daily consumption of fast food ( $p < 0.01$ ).

Multivariate linear regression revealed several factors predicting age of diagnosis in CD and UC patients, shown in Table 3. Significant environmental factors from logistic regression analysis predicting disease phenotype and extra-intestinal manifestations at diagnosis, as well as surgery, hospitalization, biological therapy, severe disease course, and treatment step reached during follow-up are shown in Tables 4 and 5.

For CD patients disease behaviour was associated with risk of surgery during the first year of disease (non-penetrating, non-stricturing vs. penetrating disease: OR: 0.08, 95% CI: 0.03–0.22; stricturing vs. penetrating OR: 1.0, 95% CI: 0.43–2.33), a severe disease course (non-penetrating, non-stricturing vs. penetrating disease: OR: 0.18, 95% CI: 0.08–0.44; stricturing vs. penetrating OR: 0.86, 95% CI: 0.31–2.41), treatment step (non-penetrating, non-stricturing vs. penetrating disease: OR: 0.23, 95% CI: 0.13–0.42; stricturing vs. penetrating OR: 0.73, 95% CI: 0.37–1.43), and hospitalization (non-penetrating, non-stricturing vs. penetrating disease: OR: 0.27, 95% CI: 0.14–0.54; stricturing vs. penetrating OR: 0.89, 95% CI: 0.41–1.93).

In UC patients disease extent was associated with hospitalization (proctitis vs. extensive colitis OR: 0.24, 95% CI: 0.10–0.61; left-sided vs. extensive OR: 0.54, 95% CI: 0.31–0.95), biological therapy (proctitis vs. extensive colitis OR: 0.11, 95% CI: 0.01–0.84; left-sided vs. extensive OR: 0.49, 95% CI: 0.21–1.11), severe disease course (proctitis vs. extensive colitis OR: 0.14, 95% CI: 0.08–0.24; left-sided vs. extensive OR: 0.42, 95% CI: 0.29–0.62), and treatment step (proctitis vs. extensive colitis OR: 0.33, 95% CI: 0.21–0.54; left-sided vs. extensive OR: 0.57, 95% CI: 0.40–0.81).

## 4. Discussion

In this population-based inception cohort of unselected IBD patients from Eastern and Western Europe we have shown that patients in the geographic regions differ in terms of environmental factors present prior to diagnosis. Eastern European patients reported more vaccinations against tuberculosis, pertussis, measles, rubella, diphtheria, and polio, as well as fewer childhood infections with measles, pertussis, and mumps than Western European patients. Eastern European CD patients consumed less fibre and more sugar than CD patients in Western Europe. Daily fast food consumption was more frequent in Eastern European than in Western European UC patients.

The rapid increase in CD and UC incidence during the last decades is unlikely to be explained by a change in genetic susceptibility in the population alone. Westernisation of lifestyle, including an increased consumption of refined sugar, fatty acids, fast food, and reduced consumption of fruit, vegetables and fibres,<sup>19</sup> in the societies experiencing an increasing occurrence of IBD may, at least in part, be responsible for the recent changes<sup>20</sup> as many aspects of a western diet have been linked with a risk of IBD.<sup>21–24</sup> The substantial political and economic changes in countries from

**Table 1** Patient characteristics of 1,182 incident patients from the ECCO-EpiCom cohort.

|                                                        | Western European centres |             |             | Eastern European centres |             |            |
|--------------------------------------------------------|--------------------------|-------------|-------------|--------------------------|-------------|------------|
|                                                        | CD                       | UC          | IBDU        | CD                       | UC          | IBDU       |
| No. of patients (%)                                    | 345 (37%)                | 483 (52%)   | 105 (11%)   | 99 (40%)                 | 144 (58%)   | 6 (2%)     |
| Male (%)                                               | 181 (52%)                | 269 (56%)   | 51 (49%)    | 58 (59%)                 | 82 (57%)    | 4 (67%)    |
| Female (%)                                             | 164 (48%)                | 214 (44%)   | 54 (51%)    | 41 (41%)                 | 62 (43%)    | 2 (33%)    |
| Age at diagnosis, years                                | 35 (16–89)               | 39 (15–89)  | 38 (17–79)  | 31 (15–78)               | 36 (18–81)  | 30 (20–34) |
| Time to diagnosis, months                              | 4.6 (0–374)              | 2.5 (0–255) | 2.5 (0–362) | 3.3 (0–126)              | 2.2 (0–240) | 2.7 (0–38) |
| First degree relative with IBD                         | 34 (10%)                 | 55 (11%)    | 18 (17%)    | 7 (7%)                   | 10 (7%)     | 1 (17%)    |
| <b>Extra-intestinal complications</b>                  |                          |             |             |                          |             |            |
| None                                                   | 299 (87%)                | 436 (90%)   | 90 (86%)    | 83 (84%)                 | 127 (88%)   | 5 (83%)    |
| Skin                                                   | 3 (1%)                   | 6 (1%)      | 2 (2%)      | 2 (2%)                   | 0 (0%)      | 0 (0%)     |
| Eyes                                                   | 4 (1%)                   | 3 (1%)      | 2 (2%)      | 0 (0%)                   | 1 (1%)      | 0 (0%)     |
| Joints                                                 | 33 (10%)                 | 32 (7%)     | 8 (8%)      | 13 (13%)                 | 12 (8%)     | 1 (17%)    |
| Primary Sclerosing Cholangitis                         | 0 (0%)                   | 2 (0%)      | 0 (0%)      | 0 (0%)                   | 2 (1%)      | 0 (0%)     |
| Pancreatitis                                           | 2 (1%)                   | 0 (0%)      | 0 (0%)      | 0 (0%)                   | 2 (1%)      | 0 (0%)     |
| Other                                                  | 4 (1%)                   | 4 (1%)      | 3 (3%)      | 2 (2%)                   | 1 (1%)      | 0 (0%)     |
| <b>Disease extent at diagnosis</b>                     |                          |             |             |                          |             |            |
| E1: Proctitis                                          |                          | 95 (20%)    |             |                          | 29 (20%)    |            |
| E2: Left-sided                                         |                          | 204 (42%)   |             |                          | 67 (47%)    |            |
| E3: Extensive colitis                                  |                          | 184 (38%)   |             |                          | 48 (33%)    |            |
| <b>Disease location at diagnosis</b>                   |                          |             |             |                          |             |            |
| L1: terminal ileum                                     | 101 (30%)                |             |             | 38 (39%)                 |             |            |
| L2: colonic                                            | 88 (26%)                 |             |             | 20 (20%)                 |             |            |
| L3: ileo-colonic                                       | 79 (23%)                 |             |             | 24 (24%)                 |             |            |
| L4: upper gastro-intestinal tract                      | 25 (7%)                  |             |             | 1 (1%)                   |             |            |
| L1+L4                                                  | 22 (6%)                  |             |             | 5 (5%)                   |             |            |
| L2+L4                                                  | 10 (3%)                  |             |             | 3 (3%)                   |             |            |
| L3+L4                                                  | 16 (5%)                  |             |             | 7 (7%)                   |             |            |
| <b>Disease behaviour at diagnosis</b>                  |                          |             |             |                          |             |            |
| B1: non-stricturing, non-penetrating                   | 212 (61%)                |             |             | 67 (68%)                 |             |            |
| B2: stricturing                                        | 70 (20%)                 |             |             | 19 (19%)                 |             |            |
| B3: penetrating                                        | 28 (8%)                  |             |             | 5 (5%)                   |             |            |
| B1p: B1 + perianal                                     | 15 (4%)                  |             |             | 1 (1%)                   |             |            |
| B2p: B2 + perianal                                     | 3 (1%)                   |             |             | 0 (0%)                   |             |            |
| B3p: B3 + perianal                                     | 17 (5%)                  |             |             | 7 (7%)                   |             |            |
| <b>Highest treatment step reached during follow-up</b> |                          |             |             |                          |             |            |
| 0: No treatment                                        | 9 (3%)*                  | 3 (1%)*     | 0 (0%)      | 0 (0%)                   | 2 (1%)      | 0 (0%)     |
| 1: 5-ASA                                               | 46 (13%)*                | 236 (49%)*  | 50 (48%)    | 27 (27%)                 | 88 (61%)    | 4 (67%)    |
| 2: GCS                                                 | 58 (17%)*                | 127 (26%)*  | 30 (29%)    | 23 (23%)                 | 34 (24%)    | 1 (17%)    |
| 3: Immunomodulators                                    | 117 (34%)*               | 80 (17%)*   | 12 (11%)    | 34 (34%)                 | 17 (12%)    | 1 (17%)    |
| 4: Biological therapy                                  | 67 (19%)*                | 23 (5%)*    | 10 (10%)    | 5 (5%)                   | 1 (1%)      | 0 (0%)     |
| 5: Surgery                                             | 48 (14%)*                | 14 (3%)*    | 3 (3%)      | 10 (10%)                 | 2 (1%)      | 0 (0%)     |

\* Difference between geographic regions,  $p < 0.05$

the former Soviet Union have e.g. resulted in an increased consumption of non-traditional, energy-dense processed foods<sup>25,26</sup> impacting on the risk of noncommunicable chronic diseases in these countries.<sup>27</sup> However, comparisons of dietary habits in Eastern and Western European countries are sparse and difficult to perform because of differences in methodology.<sup>28</sup> Dietary habits play an important role in shaping the microbiota of the human gut,<sup>29</sup> and a 'Westernised' diet is hypothesized to alter the intestinal microbiota towards a composition which increases the risk for the development of IBD.<sup>8,30</sup> However, most dietary studies have reported inconsistent findings regarding the role of dietary factors in the development of IBD.<sup>31,32</sup>

Previous studies have shown that a high consumption of dietary fibre, fruits and vegetables is inversely associated with the risk of CD.<sup>17,21,23,24</sup> In the present study significantly more Western European CD patients reported a high daily intake of all three food groups prior to the diagnosis. Additionally, more Eastern European CD and UC patients reported a high daily intake of sugar, including soft drinks. High daily sugar consumption was associated with an earlier age of diagnosis in CD and was inversely associated with the need for higher treatment steps during follow-up. Increased sugar intake has previously been linked to the development of CD<sup>14,23,31</sup> and soft drink consumption has been proposed as a possible risk factor for CD and UC,<sup>33</sup> although overall

**Table 2** Environmental factors prior to diagnosis in Eastern and Western European patients with inflammatory bowel disease.

|                         | Western Europe |            |           | Eastern Europe |           |          |
|-------------------------|----------------|------------|-----------|----------------|-----------|----------|
|                         | CD             | UC         | IBDU      | CD             | UC        | IBDU     |
| Smoking status          |                |            |           |                |           |          |
| Never                   | 141 (42%)      | 262 (56%)  | 50 (51%)  | 36 (37%)       | 77 (53%)  | 4 (67%)  |
| Currently               | 120 (36%)**    | 38 (8%)    | 14 (14%)  | 37 (38%)**     | 16 (11%)  | 2 (33%)  |
| Former smoker           | 76 (23%)**     | 168 (36%)  | 35 (35%)  | 25 (26%)**     | 51 (35%)  | 0 (0%)   |
| Breastfeeding           | 223 (65%)      | 307 (64%)  | 64 (61%)  | 68 (69%)       | 92 (64%)  | 4 (67%)  |
| Tonsillectomy           | 62 (18%)       | 82 (17%)   | 16 (15%)  | 21 (21%)       | 26 (18%)  | 3 (50%)  |
| Appendectomy            | 45 (13%)       | 45 (9%)*   | 6 (6%)    | 12 (12%)**     | 3 (2%)    | 0 (0%)   |
| Access to running water | 312 (90%)      | 442 (92%)  | 90 (86%)  | 94 (95%)       | 126 (88%) | 6 (100%) |
| Vaccinations:           |                |            |           |                |           |          |
| Tuberculosis            | 175 (51%)*     | 270 (56%)* | 57 (54%)  | 78 (79%)       | 105 (73%) | 5 (83%)  |
| Pertussis               | 159 (46%)*     | 217 (45%)* | 51 (49%)  | 75 (76%)       | 94 (65%)  | 4 (67%)  |
| Measles                 | 185 (54%)*     | 236 (49%)* | 46 (44%)  | 67 (68%)       | 89 (62%)  | 5 (83%)  |
| Rubella                 | 177 (51%)*     | 226 (47%)* | 39 (37%)  | 63 (64%)       | 75 (52%)  | 3 (50%)  |
| Diphtheria              | 184 (53%)**    | 292 (60%)* | 63 (60%)  | 75 (76%)       | 108 (75%) | 5 (83%)  |
| Tetanus                 | 244 (71%)      | 361 (75%)  | 80 (76%)  | 79 (80%)       | 99 (69%)  | 4 (67%)  |
| Polio                   | 209 (61%)**    | 342 (71%)  | 73 (70%)  | 73 (74%)       | 108 (75%) | 4 (67%)  |
| Childhood infections    |                |            |           |                |           |          |
| Measles                 | 109 (32%)*     | 178 (37%)* | 45 (43%)  | 14 (14%)       | 28 (19%)  | 0 (0%)   |
| Pertussis               | 39 (11%)*      | 51 (11%)*  | 13 (12%)  | 1 (1%)         | 3 (2%)    | 0 (0%)   |
| Rubella                 | 82 (24%)       | 116 (24%)  | 26 (25%)  | 21 (21%)       | 26 (18%)  | 1 (17%)  |
| Chicken pox             | 219 (63%)      | 319 (66%)  | 60 (57%)  | 68 (69%)       | 89 (62%)  | 5 (83%)  |
| Mumps                   | 64 (19%)**     | 131 (27%)* | 33 (31%)  | 21 (21%)       | 23 (16%)  | 1 (17%)  |
| Scarlet fever           | 32 (9%)        | 56 (12%)   | 7 (7%)    | 8 (8%)         | 10 (7%)   | 0 (0%)   |
| Fruit daily             | 185 (54%)*     | 265 (55%)  | 57 (54%)  | 39 (39%)       | 67 (47%)  | 2 (33%)  |
| Vegetables daily        | 204 (59%)*     | 287 (59%)  | 70 (67%)  | 41 (41%)**     | 79 (55%)  | 2 (33%)  |
| Bread (≥ 4 slices/day)  | 159 (46%)      | 220 (46%)* | 39 (37%)  | 49 (49%)       | 84 (58%)  | 3 (50%)  |
| Eggs daily              | 24 (7%)        | 43 (9%)*   | 95 (90%)  | 13 (13%)       | 27 (19%)  | 1 (17%)  |
| Muesli daily            | 28 (8%)        | 52 (11%)*  | 12 (11%)  | 6 (6%)         | 5 (3%)    | 0 (0%)   |
| Cornflakes daily        | 41 (12%)*      | 39 (8%)    | 7 (7%)    | 5 (5%)         | 7 (5%)    | 0 (0%)   |
| High fibre intake       | 148 (43%)*     | 223 (46%)* | 57 (54%)  | 25 (25%)       | 48 (33%)  | 1 (17%)  |
| High sugar intake       | 160 (46%)**    | 188 (39%)* | 36 (34%)  | 63 (64%)       | 99 (69%)  | 2 (33%)  |
| Soft drink daily        | 80 (23%)**     | 82 (17%)*  | 14 (13%)* | 47 (47%)       | 68 (47%)  | 4 (67%)  |
| Fast food daily         | 30 (9%)        | 33 (7%)*   | 4 (4%)*   | 10 (10%)       | 20 (14%)  | 3 (50%)  |
| Juice daily             | 100 (29%)      | 131 (27%)  | 23 (22%)  | 21 (21%)       | 39 (27%)  | 3 (50%)  |
| Coffee (≥ 2 cups/day)   | 126 (37%)*     | 206 (43%)* | 39 (37%)  | 25 (25%)       | 39 (27%)  | 2 (33%)  |
| Tea (≥ 2 cups/day)      | 95 (28%)*      | 128 (27%)* | 29 (28%)  | 43 (43%)       | 73 (51%)  | 4 (67%)  |
| Caffeine                | 182 (53%)      | 275 (57%)  | 56 (53%)  | 53 (54%)       | 81 (56%)  | 4 (67%)  |
| Oral contraceptive use  | 49 (30%)       | 52 (24%)   | 11 (20%)  | 11 (27%)**     | 6 (10%)   | 1 (50%)  |
| Daily physical activity | 102 (30%)      | 176 (36%)  | 39 (37%)  | 39 (39%)       | 57 (40%)  | 3 (50%)  |

\* Difference between geographic regions,  $p < 0.05$ .

\*\* Difference between Crohn's disease and ulcerative colitis patients,  $p < 0.05$ .

evidence is inconsistent and subject to important methodological limitations such as the lack of prospective studies.<sup>34</sup> Furthermore, the question remains whether the high sugar intake is in fact a consequence of CD symptoms and patients are simply trying to counteract weight loss or fatigue.<sup>35</sup>

Overall, incidence rates for CD and UC were in this cohort found to be twice as high in Western Europe than in Eastern Europe,<sup>5</sup> but it would seem that Eastern European patients are exposed to a greater number of risk factors – some who have been confirmed in a Danish population-based inception cohort<sup>17</sup> – prior to diagnosis than Western European patients, thus supporting the hypothesis of Western diet as part of the explanation for the increasing incidence. However, due to the lack of a control group in this study the true impact of dietary

habits in disease risk needs to be confirmed in further prospective studies. Also, since no previous study on the diet of Eastern European IBD patients pre-diagnosis is available for comparison we are not able to assess the changes in diet over time.

In a Swedish population-based case control study the consumption of fast food was associated with an increased risk of CD and UC.<sup>36</sup> In the present study more Eastern European than Western European patients reported daily consumption of fast food among those with UC but not CD, and daily consumption of fast food was associated with young age at diagnosis in both CD and UC as well as increased risk for surgery and severe disease extent in UC patients. Additionally, the proportion of patients reporting a high

**Table 3** Factors predicting a young age at diagnosis for patients with Crohn's disease (CD) and ulcerative colitis (UC) in a European inception cohort.

|                               | CD        | UC        |
|-------------------------------|-----------|-----------|
| Male gender                   | p = 0.034 | –         |
| Current smoker                | p = 0.004 | –         |
| Previous smoker               | –         | p < 0.001 |
| Ever smoked                   | p < 0.001 | –         |
| No tonsillectomy < 20 yr      | –         | p = 0.013 |
| No appendectomy < 20 yr       | p = 0.002 | p < 0.001 |
| Breastfeeding during infancy  | –         | p = 0.014 |
| Running water at home         | p < 0.001 | p < 0.001 |
| Oral contraceptives           | p < 0.001 | p < 0.001 |
| High sugar intake consumption | p = 0.006 | –         |
| Low daily caffeine intake     | –         | p < 0.001 |
| Daily fast food consumption   | p < 0.001 | p < 0.001 |

caffeine intake was similar in both geographic regions for CD and UC, but high caffeine consumption was associated with the risk of surgery and a severe disease course during follow-up in CD and with the presence of extra-intestinal manifestations at diagnosis in UC patients. However, high caffeine intake was also inversely associated with young age at diagnosis. This is in conflict with other studies that mostly did not find a relationship between caffeine and IBD.<sup>37</sup> Whether fast food and caffeine directly influence the risk and course of IBD or are surrogate markers for e.g. psychological stress<sup>38,39</sup> or a higher consumption of bacteria in food remains to be proven.

The risk of CD and UC has consistently been reported to be increased by the use of oral contraceptives,<sup>40</sup> with the mechanism hypothesized to be multifocal, microvascular gastrointestinal infarctions.<sup>41</sup> In the present study the use of oral contraceptives was significantly associated with a young age at diagnosis. This conclusion, however, is biased due to

the lack of a control group. Patients in this cohort are young and a high frequency of oral contraceptive use is expected. Furthermore, oral contraceptives in UC were inversely associated with requiring the highest necessary treatment step during follow-up as well as severe disease extent at diagnosis. The influence of oral contraceptives on disease course in IBD patients remains unclear.<sup>42,43</sup> However, a Danish inception cohort study found a similar relationship between use of oral contraception and disease localisation of UC.<sup>15</sup>

Appendectomy is thought to be inversely associated with the development of UC.<sup>44,45</sup> In this cohort significantly more Western than Eastern European UC patients reported an appendectomy before the age of 20. Additionally, in Eastern Europe more CD patients had an appendectomy prior to diagnosis than UC patients, in accordance with a Danish population-based cohort.<sup>15</sup> The association of appendectomy with CD is still unclear.<sup>46</sup> Interestingly, appendectomy decreased the odds of a severe disease course in CD patients as well as the need for biological therapy, whereas others have reported a worsened disease course.<sup>47</sup> Appendectomy was inversely associated with young age at diagnosis, in accordance with a previous Australian study.<sup>48</sup> No difference in the occurrence of breastfeeding during infancy between Eastern and Western Europe was found. Breastfeeding is thought to have a protective effect against CD and UC.<sup>49</sup> In this study we could not confirm this observation, since breastfeeding during infancy was found to be associated with young age at diagnosis as well as with the risk of presenting with extra-intestinal manifestations at diagnosis in CD.

In terms of childhood infections and vaccinations we observed significant geographic differences in both CD and UC patients. Vaccinations against tuberculosis, pertussis, measles, rubella, diphtheria, and polio occurred more frequently, while childhood infections with measles, pertussis, and mumps had occurred less frequently in Eastern European CD and UC patients compared to Western European patients. It has been hypothesized that a lack of exposures to enteric pathogens

**Table 4** Environmental factors and Crohn's disease patients' subsequent risk (odds ratio, 95% CI) of hospitalization, surgery, biological therapy, severe disease course, extra-intestinal manifestations, high treatment step, and behaviour in a European inception cohort.

|                              | Hospitalization | Surgery          | Biological therapy | Severe disease course | Extra-intestinal manifestations | Treatment step   | Disease behaviour |
|------------------------------|-----------------|------------------|--------------------|-----------------------|---------------------------------|------------------|-------------------|
| Age at diagnosis, per year   | –               | –                | 0.98 (0.96–1.0)    | 0.97 (0.96–0.99)      | –                               | 0.98 (0.97–0.99) | –                 |
| Being Eastern European       | –               | –                | 0.11 (0.03–0.36)   | 0.33 (0.19–0.58)      | –                               | 0.37 (0.23–0.60) | –                 |
| Current smoking              | –               | –                | –                  | –                     | –                               | –                | 1.59 (1.03–2.44)  |
| High intake of caffeine      | –               | 2.18 (1.01–4.71) | –                  | 1.86 (1.15–2.99)      | –                               | 1.84 (1.24–2.72) | –                 |
| Appendectomy                 | –               | –                | 0.25 (0.07–0.83)   | 0.34 (0.17–0.66)      | –                               | 0.48 (0.27–0.86) | –                 |
| High daily sugar intake      | –               | –                | –                  | 0.53 (0.33–0.86)      | –                               | –                | –                 |
| Breastfeeding during infancy | –               | –                | –                  | –                     | 2.34 (1.17–4.67)                | –                | –                 |

**Table 5** Environmental factors and ulcerative colitis patients' subsequent risk (odds ratio, 95% CI) of hospitalization, surgery, biological therapy, severe disease course, extra-intestinal manifestations, high treatment step, and extent in a European inception cohort.

|                             | Hospitalization     | Surgery              | Biological therapy  | Severe disease course | Extra-intestinal manifestations | Treatment step      | Disease Extent      |
|-----------------------------|---------------------|----------------------|---------------------|-----------------------|---------------------------------|---------------------|---------------------|
| Age at diagnosis, per year  | 0.98<br>(0.96–1.0)  | –                    | 0.95<br>(0.92–1.0)  | 0.99<br>(0.98–1.0)    | –                               | –                   | –                   |
| Female vs. male             | –                   | –                    | –                   | –                     | 2.14<br>(1.25–3.68)             | –                   | 0.68<br>(0.49–0.95) |
| Being Eastern European      | 0.31<br>(0.14–0.69) | –                    | 0.08<br>(0.01–0.62) | 0.55<br>(0.36–0.84)   | –                               | 0.43<br>(0.29–0.64) | –                   |
| IBD in 1st degree relatives | 0.29<br>(0.09–0.95) | –                    | –                   | –                     | 2.22<br>(1.10–4.51)             | –                   | 1.76<br>(1.07–2.89) |
| Never smoked                | –                   | –                    | 2.86<br>(1.21–6.75) | –                     | –                               | –                   | –                   |
| Oral contraceptive          | –                   | –                    | –                   | –                     | –                               | 0.51<br>(0.29–0.92) | 0.56<br>(0.33–0.98) |
| Daily fast food intake      | –                   | 5.78<br>(1.88–17.76) | –                   | –                     | –                               | –                   | 2.03<br>(1.17–3.52) |
| High intake of caffeine     | –                   | –                    | –                   | –                     | 2.86<br>(1.55–5.26)             | 0.67<br>(0.50–0.95) | –                   |

during childhood is a risk factor for CD especially<sup>50,51</sup> and that multiple childhood infections and poor hygiene are protective against IBD.<sup>52</sup> In light of this hypothesis one could suggest that Eastern European patients in this cohort carried a risk for developing IBD due to more vaccinations and fewer infections during childhood, however, the observed differences could be skewed by recall bias. Furthermore, studies have focused on specific infectious agents like paromyxoviral infection and vaccination with inconsistent findings.<sup>53–55</sup> In this study the prevalence of childhood infections and vaccinations was highly correlated with year of birth, as the vaccination pattern apparently has changed during the lifetime of the patients included. Therefore only age at diagnosis was included in the analysis.

Finally, the impact of smoking on the risk and severity of CD and UC has been thoroughly investigated. Active smoking is a risk factor for developing CD while being protective against UC.<sup>56,57</sup> In accordance with this, in both regions more CD patients than UC patients were current smokers at diagnosis, while more UC than CD patients were previously smokers. The frequency of smokers and former smokers was similar to estimations from the European Union.<sup>58</sup> Current smoking at diagnosis was positively associated with more severe disease behaviour and young age at diagnosis in CD, while previous smoking was associated with young age at diagnosis in UC patients. UC patients who had never smoked prior to diagnosis had higher odds of needing biological therapy during the first year of disease.

The primary strength of this study was that the EpiCom cohort is population-based, that patients were prospectively included and followed up, and that the cohort consists of unselected IBD patients thus representing the broad spectrum of disease from mild to severe cases. Data quality and validity as well as consistency between centres were ensured by various measures described elsewhere.<sup>5</sup> Furthermore, a short duration from onset of symptoms to diagnosis,<sup>5</sup>

as well as the fact that patients answered the questionnaire very close to the date of diagnosis to some extent reduced the risk of recall bias concerning e.g. dietary habits prior to the IBD diagnosis. However, a number of important limitations need to be considered. The IOIBD questionnaire, although previously used,<sup>14–17</sup> has never been validated or, to our knowledge, properly forward/backward translated into languages other than English. Because of the cost of such a validation and translation process and since the IOIBD questionnaire was constructed by an expert group and never tested in other specialist group, patients or IBD nurses it was decided in the EpiCom-group not to include a validation in the protocol. Also, in this study if patients were not able to fill out the questionnaire by themselves the doctor or IBD specialist nurse completed the questionnaire together with the patient and this could have introduced bias in the results. Questions regarding factors from early life such as vaccinations and infections are most likely subject to reporting and recall bias, while questions regarding dietary factors could be biased by misclassifications by the patients. Furthermore, some questions in the questionnaire are broad and might not capture the intended exposure of the environmental factor. Also, by including this large number of risk factors in the analysis, some associations found might be due to chance alone. Additionally, the study is limited by the fact that information on regional dietary habits and vaccination status was unavailable in several participating centres and a comparison of dietary habits between IBD patients and the background population therefore was not possible. Last and most important, since no control group was included in this study it remains to be investigated whether environmental factors influencing the IBD patients in this cohort differ from the background population, and the associations with disease presentation and course need to be further investigated.

To conclude, in this population-based inception cohort of unselected IBD patients from Eastern and Western Europe the



geographic regions differed in terms of environmental factors prior to diagnosis. The observed differences could not explain the West–East gradient in IBD incidence in Europe, but Eastern European patients exhibited higher occurrences of suspected risk factors included in the Western lifestyle for IBD, which lends support to the theory of Westernisation of lifestyle having a main role in the recent increases in IBD incidence in Eastern Europe. However, these findings demand further investigation through controlled trials.

## Conflict of interest

No authors reported any conflict of interest.

## Acknowledgements

All authors have made significant contributions to the research described in this manuscript. JB carried out the study, collected and analysed data and drafted the manuscript. All authors collected and entered data and revised the draft of the manuscript. PM took part in the planning and designing of the study and revised the draft of the manuscript. All authors read and approved the final manuscript.

We are grateful to R. Seerup (Denmark), C. Ålykke (Denmark), B. Vucelic (Croatia), N. Turk (Croatia), N. Procopiou (Cyprus), B. Järventaus (Finland), V. Tsianos (Greece), K. Stroggili (Greece), Z. Vegh (Hungary), S. Kramli (Hungary), P. Politi (Cremona, Italy), D. Valpiani (Forli, Italy), L. Jonaitis (Lithuania), I. Valantiene (Lithuania), L. Sanromán (Spain), C. Salgado (Spain), B. Almer and L. Granberg (Sweden), U.B. Widén (Sweden) and C. Tysk (Sweden) for their contribution to the patient inclusion and entering of data.

Unrestricted grant support has been received from the Danish Colitis Crohn Patients Organisation (CCF), the Vibeke Binder and Povl Riis' Foundation, the Scientific Council at Herlev Hospital, the Sigrid Rigmor Moran Foundation, Aage and Johanne Louis-Hansens Foundation, the Munkholm Foundation, the C.C. Klestrup and Henriette Klestrup Foundation, the Knud and Dagny Gad Andresens Foundation, the Else and Mogens Wedell-Wedellsborgs Foundation, the Direktør Jacob Madsen and Olga Madsen's Foundation, ScanVet, the Torben og Alice Frimodt Foundation, Lægernes forsikringsforening af 1891, Bengt Ihre's Foundation, Nanna Svartz' Foundation, Örebro University Hospital Research Foundation, Örebro County Research Foundation, The Swedish Foundation for Gastrointestinal Research, The Swedish Research Council, The Swedish Society of Medicine, the Research Council of South-East Sweden, the County Council of Östergötland, The Swedish Organisation for the study of inflammatory bowel disease, the Competitive State Research Financing of the Expert Responsibility Area of Tampere University Hospital, and the European Crohn's and Colitis Organisation. The study sponsors have made no contributions to the study design, analysis, interpretation of data, or publication. No author declared any conflict of interest.

## References

- Burisch J, Jess T, Martinato M, Lakatos PL. The burden of inflammatory bowel disease in Europe. *J Crohns Colitis* 2013;7: 322–37.
- Molodecky NA, Soon IS, Rabi DM, Ghali WA, Ferris M, Chernoff G, et al. Increasing incidence and prevalence of the inflammatory bowel diseases with time, based on systematic review. *Gastroenterology* 2012;142:46–54.
- Lakatos L, Mester G, Erdelyi Z, Balogh M, Szpocs I, Kamaras G, et al. Striking elevation in incidence and prevalence of inflammatory bowel disease in a province of western Hungary between 1977–2001. *World J Gastroenterol* 2004;10:404–9.
- Sincić BM, Vucelić B, Persić M, Brncić N, Erzen DJ, Radaković B, et al. Incidence of inflammatory bowel disease in Primorsko-goranska County, Croatia, 2000–2004: A prospective population-based study. *Scand J Gastroenterol* 2006;41:437–44.
- Burisch J, Pedersen N, Cukovic-Cavka S, Brinar M, Kaimakliotis I, Duricova D, et al. East–west gradient in the incidence of inflammatory bowel disease in Europe: the ECCO-EpiCom inception cohort. *Gut* 2013 in press.
- Danese S, Sans M, Fiocchi C. Inflammatory bowel disease: the role of environmental factors. *Autoimmun Rev* 2004;3:394–400.
- Chapman-Kiddell C a, Davies PSW, Gillen L, Radford-Smith GL. Role of diet in the development of inflammatory bowel disease. *Inflamm Bowel Dis* 2010;16:137–51.
- Martinez-Medina M, Denizot J, Dreux N, Robin F, Billard E, Bonnet R, et al. Western diet induces dysbiosis with increased *E coli* in CEABAC10 mice, alters host barrier function favouring AIEC colonisation. *Gut* 2013 in press.
- Burisch J, Pedersen N, Cukovic-Cavka S, Turk N, Kaimakliotis I, Duricova D, et al. Initial Disease Course and Treatment in an Inflammatory Bowel Disease Inception Cohort in Europe: The ECCO-EpiCom Cohort. *Inflamm Bowel Dis* 2013 in press.
- Munkholm P. Crohn's disease—occurrence, course and prognosis. An epidemiologic cohort-study. *Dan Med Bull* 1997;44: 287–302.
- Langholz E. Ulcerative colitis. An epidemiological study based on a regional inception cohort, with special reference to disease course and prognosis. *Dan Med Bull* 1999;46:400–15.
- Vind I, Riis L, Jess T, Knudsen E, Pedersen N, Elkjaer M, et al. Increasing incidences of inflammatory bowel disease and decreasing surgery rates in Copenhagen City and County, 2003–2005: a population-based study from the Danish Crohn colitis database. *Am J Gastroenterol* 2006;101:1274–82.
- Silverberg MS, Satsangi J, Ahmad T, Arnott ID, Bernstein CN, Brant SR, et al. Toward an integrated clinical, molecular and serological classification of inflammatory bowel disease: Report of a Working Party of the 2005 Montreal World Congress of Gastroenterology. *Can J Gastroenterol* 2005;19(Suppl A): 5–36.
- Halfvarson J, Jess T, Magnuson A, Montgomery SM, Orholm M, Tysk C, et al. Environmental factors in inflammatory bowel disease: a co-twin control study of a Swedish-Danish twin population. *Inflamm Bowel Dis* 2006;12:925–33.
- Vind I, Riis L, Jespersgaard C, Jess T, Knudsen E, Pedersen N, et al. Genetic and environmental factors as predictors of disease severity and extent at time of diagnosis in an inception cohort of inflammatory bowel disease, Copenhagen County and City 2003–2005. *J Crohns Colitis* 2008;2:162–9.
- Jakobsen C, Paerregaard A, Munkholm P, Wewer V. Environmental factors and risk of developing paediatric inflammatory bowel disease – a population based study 2007–2009. *J Crohns Colitis* 2013;7:79–88.
- Hansen TS, Jess T, Vind I, Elkjaer M, Nielsen MF, Gamborg M, et al. Environmental factors in inflammatory bowel disease: a case–control study based on a Danish inception cohort. *J Crohns Colitis* 2011;5:577–84.
- Burisch J, Cukovic-Cavka S, Kaimakliotis I, Shonová O, Andersen V, Dahlerup JF, et al. Construction and validation of a web-based epidemiological database for inflammatory bowel diseases in Europe An EpiCom study. *J Crohns Colitis* 2011;5: 342–9.

19. Cordain L, Eaton SB, Sebastian A, Mann N, Lindeberg S, Watkins B. a, et al. Origins and evolution of the Western diet: health implications for the 21st century. *Am J Clin Nutr* 2005;**81**: 341–54.
20. Bernstein CN, Shanahan F. Disorders of a modern lifestyle: reconciling the epidemiology of inflammatory bowel diseases. *Gut* 2008;**57**:1185–91.
21. Ananthakrishnan AN, Khalili H, Konijeti GG, Higuchi LM, de Silva P, Korzenik JR, et al. A Prospective Study of Long-term Intake of Dietary Fiber and Risk of Crohn's Disease and Ulcerative Colitis. *Gastroenterology* 2013;**145**:970–7.
22. Ananthakrishnan AN, Khalili H, Konijeti GG, Higuchi LM, de Silva P, Fuchs CS, et al. Long-term intake of dietary fat and risk of ulcerative colitis and Crohn's disease. *Gut* 2013 in press.
23. Reif S, Klein I, Lubin F, Farbstein M, Hallak A, Gilat T. Pre-illness dietary factors in inflammatory bowel disease. *Gut* 1997;**40**: 754–60.
24. Amre DK, D'Souza S, Morgan K, Seidman G, Lambrette P, Grimard G, et al. Imbalances in dietary consumption of fatty acids, vegetables, and fruits are associated with risk for Crohn's disease in children. *Am J Gastroenterol* 2007;**102**:2016–25.
25. Parízková J. Dietary habits and nutritional status in adolescents in Central and Eastern Europe. *Eur J Clin Nutr* 2000;**54**(Suppl 1): 536–40.
26. Knai C, Suhrcke M, Lobstein T. Obesity in Eastern Europe: an overview of its health and economic implications. *Econ Hum Biol* 2007;**5**:392–408.
27. Ezzati M, Riboli E. Behavioral and dietary risk factors for noncommunicable diseases. *N Engl J Med* 2013;**369**:954–64.
28. Lambert J, Agostoni C, Elmadfa I, Hulshof K, Krause E, Livingstone B, et al. Dietary intake and nutritional status of children and adolescents in Europe. *Br J Nutr* 2004;**92**(Suppl 2): S147–211.
29. Wu GD, Chen J, Hoffmann C, Bittinger K, Chen Y, Keilbaugh SA, et al. Linking long-term dietary patterns with gut microbial enterotypes. *Science* 2011;**334**:105–8.
30. Wu GD, Bushmanc FD, Lewis JD. Diet, the human gut microbiota, and IBD. *Anaerobe* 2013:1–4.
31. Hou JK, Abraham B, El-Serag H. Dietary intake and risk of developing inflammatory bowel disease: a systematic review of the literature. *Am J Gastroenterol* 2011;**106**:563–73.
32. Loftus EV. Clinical epidemiology of inflammatory bowel disease: Incidence, prevalence, and environmental influences. *Gastroenterology* 2004;**126**:1504–17.
33. Russel MG, Engels LG, Muris JW, Limonard CB, Volovics A, Brummer RJ, et al. Modern life' in the epidemiology of inflammatory bowel disease: a case–control study with special emphasis on nutritional factors. *Eur J Gastroenterol Hepatol* 1998;**10**:243–9.
34. Riordan AM, Ruxton CH, Hunter JO. A review of associations between Crohn's disease and consumption of sugars. *Eur J Clin Nutr* 1998;**52**:229–38.
35. Thornton JR, Emmett PM, Heaton KW. Diet and Crohn's disease: characteristics of the pre-illness diet. *BMJ* 1979;**2**:762–4.
36. Persson PG, Ahlbom A, Hellers G. Diet and inflammatory bowel disease: a case–control study. *Epidemiology* 1992;**3**:47–52.
37. Krishnan A, Korzenik JR. Inflammatory bowel disease and environmental influences. *Gastroenterol Clin North Am* 2002;**31**:21–39.
38. Mawdsley JE, Macey MG, Feakins RM, Langmead L, Rampton DS. The effect of acute psychologic stress on systemic and rectal mucosal measures of inflammation in ulcerative colitis. *Gastroenterology* 2006;**131**:410–9.
39. Qiu BS, Vallance B. a, Blennerhassett P a, Collins SM. The role of CD4+ lymphocytes in the susceptibility of mice to stress-induced reactivation of experimental colitis. *Nat Med* 1999;**5**:1178–82.
40. Cornish J. a, Tan E, Simillis C, Clark SK, Teare J, Tekkis PP. The risk of oral contraceptives in the etiology of inflammatory bowel disease: a meta-analysis. *Am J Gastroenterol* 2008;**103**:2394–400.
41. Wakefield AJ, Sawyerr AM, Hudson M, Dhillon AP, Pounder RE. Smoking, the oral contraceptive pill, and Crohn's disease. *Dig Dis Sci* 1991;**36**:1147–50.
42. Cosnes J, Carbonnel F, Carrat F, Beaugerie L, Gendre JP. Oral contraceptive use and the clinical course of Crohn's disease: a prospective cohort study. *Gut* 1999;**45**:218–22.
43. Timmer A, Sutherland LR, Martin F. Oral contraceptive use and smoking are risk factors for relapse in Crohn's disease. The Canadian Mesalamine for Remission of Crohn's Disease Study Group. *Gastroenterology* 1998;**114**:1143–50.
44. Andersson RE, Olaison G, Tysk C, Ekbo A. Appendectomy and protection against ulcerative colitis. *N Engl J Med* 2001;**344**: 808–14.
45. Koutroubakis IE, Vlachonikolis IG, Kouroumalis E. a. Role of appendicitis and appendectomy in the pathogenesis of ulcerative colitis: a critical review. *Inflamm Bowel Dis* 2002;**8**: 277–86.
46. Kaplan GG, Jackson T, Sands BE, Frisch M, Andersson RE, Korzenik J. The risk of developing Crohn's disease after an appendectomy: a meta-analysis. *Am J Gastroenterol* 2008;**103**: 2925–31.
47. Andersson RE, Olaison G, Tysk C, Ekbo A. Appendectomy is followed by increased risk of Crohn's disease. *Gastroenterology* 2003;**124**:40–6.
48. Radford-Smith GL, Edwards JE, Purdie DM, Pandeya N, Watson M, Martin NG, et al. Protective role of appendectomy on onset and severity of ulcerative colitis and Crohn's disease. *Gut* 2002;**51**:808–13.
49. Klement E, Cohen RV, Boxman J, Joseph A, Reif S. Breastfeeding and risk of inflammatory bowel disease: a systematic review with meta-analysis. *Am J Clin Nutr* 2004;**80**:1342–52.
50. Gent AE, Hellier MD, Grace RH, Swarbrick ET, Coggon D. Inflammatory bowel disease and domestic hygiene in infancy. *Lancet* 1994;**343**:766–7.
51. Duggan AE, Usmani I, Neal KR, Logan RF. Appendectomy, childhood hygiene, Helicobacter pylori status, and risk of inflammatory bowel disease: a case control study. *Gut* 1998;**43**:494–8.
52. Wurzelmann JI, Lyles CM, Sandler RS. Childhood infections and the risk of inflammatory bowel disease. *Dig Dis Sci* 1994;**39**: 555–60.
53. Thompson NP, Montgomery SM, Pounder RE, Wakefield AJ. Is measles vaccination a risk factor for inflammatory bowel disease? *Lancet* 1995;**345**:1071–4.
54. Bernstein CN, Rawsthorne P, Blanchard JF. Population-based case–control study of measles, mumps, and rubella and inflammatory bowel disease. *Inflamm Bowel Dis* 2007;**13**:759–62.
55. Amre DK, Lambrette P, Law L, Krupoves A, Chotard V, Costea F, et al. Investigating the hygiene hypothesis as a risk factor in pediatric onset Crohn's disease: a case–control study. *Am J Gastroenterol* 2006;**101**:1005–11.
56. Mahid SS, Minor KS, Soto RE, Hornung CA, Galandiuk S. Smoking and inflammatory bowel disease: a meta-analysis. *Mayo Clin Proc* 2006;**81**:1462–71.
57. Higuchi LM, Khalili H, Chan AT, Richter JM, Bousvaros A, Fuchs CS. A prospective study of cigarette smoking and the risk of inflammatory bowel disease in women. *Am J Gastroenterol* 2012;**107**:1399–406.
58. Special Eurobarometer. 272c/Wave 66.2 - Attitudes of Europeans towards Tobacco; 2007;1–52.
